# Supplementary material for: Identification of avian flapping motion from non-volant winged dinosaurs based on modal effective mass analysis
Source: PubMed Central journal article supplement (PMC6497222; doi:10.1371/journal.pcbi.1006846), 2019-05-02
Supplement: pcbi.1006846.s012.pdf [file pcbi.1006846.s012.pdf]

# Tables

Identification of avian flapping motion from non-volant winged dinosaurs based on  
modal effective mass analysis

Yaser Saffar Talori<sup>1</sup>, Jing-Shan Zhao<sup>1\*</sup>, Yun-Fei Liu<sup>1</sup>, Wen-Xiu Lu<sup>1</sup>, Zhi-Heng Li<sup>2</sup> and Jingmai  
Kathleen O'Connor<sup>2</sup>

\*Jing-Shan Zhao

Email: [jingshanzhao@mail.tsinghua.edu.cn](mailto:jingshanzhao@mail.tsinghua.edu.cn)

**This file includes:**

Tables A to F

**Table A. Parameters of *Caudipteryx zoui* (BPM 0001).**

| <b>Measurements of the <i>Caudipteryx</i> model</b> |                    |                    |
|-----------------------------------------------------|--------------------|--------------------|
|                                                     | <b>Length (mm)</b> | <b>Mass (gram)</b> |
| <b>Maximum skull length</b>                         | 91                 | 500                |
| <b>Maximum skull width</b>                          | 59                 |                    |
| <b>Total length of cervical vertebrae</b>           | 176                |                    |
| <b>Body length</b>                                  | 215                | 2400               |
| <b>Maximum body height</b>                          | 165                |                    |
| <b>Humerus length</b>                               | 72                 | 1000               |
| <b>Ulna length</b>                                  | 62                 |                    |
| <b>Radius length</b>                                | 59                 |                    |
| <b>Manus</b>                                        | 91                 |                    |
| <b>Femur length</b>                                 | 145                | 400                |
| <b>Tibia</b>                                        | 188                |                    |
| <b>Fibula</b>                                       | 188                |                    |
| <b>Length of tail</b>                               | 221                | 700                |

**Table B. Mass and stiffness distribution of *Caudipteryx*.**

| <b>Mass</b>       | <b>Value (Kg)</b> | <b>Stiffness</b> | <b>(N/mm)</b> |
|-------------------|-------------------|------------------|---------------|
| $m_1$             | 2.400             | $k_1$            | 1000          |
| $m_2$             | 0.500             | $k_2$            | 200           |
| $m_3$             | 0.500             | $k_3$            | 200           |
| $m_4$             | 0.200             | $k_4$            | 650           |
| $m_5$             | 0.200             | $k_5$            | 650           |
| $m_6$             | 0.500             | $k_6$            | 800           |
| $m_7$             | 0.700             | $k_7$            | 800           |
| <b>Total mass</b> | <b>5</b>          |                  |               |

**Table C. Natural frequencies and effective masses of simplified Seven-degree-of-freedom system of *Caudipteryx*.**

| <b>Natural Frequencies</b> | <b>(Hz)</b>   | <b>Effective Mass</b> | <b>(Kg)</b> |
|----------------------------|---------------|-----------------------|-------------|
| $f_1$                      | <b>1.9239</b> | $m_{eff, 1}$          | 4.6546      |
| $f_2$                      | 3.1831        | $m_{eff, 2}$          | 0           |
| $f_3$                      | 3.6693        | $m_{eff, 3}$          | 0.1642      |
| $f_4$                      | 5.7956        | $m_{eff, 4}$          | 0.0107      |
| $f_5$                      | 7.57          | $m_{eff, 5}$          | 0.0371      |
| $f_6$                      | 14.456        | $m_{eff, 6}$          | 0           |
| $f_7$                      | 14.675        | $m_{eff, 7}$          | 0.1334      |
|                            |               | <b>Total</b>          | <b>5 Kg</b> |

**Table D. Eight excessive assumed mass distribution in the format of models A, B, ..., I, and model D is the actual one.**

| <b>Assumed Mass Body (Gram)</b> |             |             |             |             |             |             |             |             |              |
|---------------------------------|-------------|-------------|-------------|-------------|-------------|-------------|-------------|-------------|--------------|
| <b>Mass</b>                     | <b>A</b>    | <b>B</b>    | <b>C</b>    | <b>D</b>    | <b>E</b>    | <b>F</b>    | <b>G</b>    | <b>H</b>    | <b>I</b>     |
| <i>m</i> <sub>1</sub>           | 960         | 1440        | 1920        | <b>2400</b> | 2880        | 3360        | 3840        | 4320        | 4800         |
| <i>m</i> <sub>2</sub>           | 200         | 300         | 400         | <b>500</b>  | 600         | 700         | 800         | 900         | 1000         |
| <i>m</i> <sub>3</sub>           | 200         | 300         | 400         | <b>500</b>  | 600         | 700         | 800         | 900         | 1000         |
| <i>m</i> <sub>4</sub>           | 80          | 120         | 160         | <b>200</b>  | 240         | 280         | 320         | 360         | 400          |
| <i>m</i> <sub>5</sub>           | 80          | 120         | 160         | <b>200</b>  | 240         | 280         | 320         | 360         | 400          |
| <i>m</i> <sub>6</sub>           | 200         | 300         | 400         | <b>500</b>  | 600         | 700         | 800         | 900         | 1000         |
| <i>m</i> <sub>7</sub>           | 280         | 420         | 560         | <b>700</b>  | 840         | 980         | 1120        | 1260        | 1400         |
| <b>Total</b>                    | <b>2000</b> | <b>3000</b> | <b>4000</b> | <b>5000</b> | <b>6000</b> | <b>7000</b> | <b>8000</b> | <b>9000</b> | <b>10000</b> |

**Table E. Computer simulation for the first twenty natural frequencies and modal effective mass of *Caudipteryx*.**

| Eigenvalues Output |        |            |               | Effective Mass Output (gram) |                |          |
|--------------------|--------|------------|---------------|------------------------------|----------------|----------|
| Mode               | Eigen  | FREQUENCY  |               | X-Axis                       | Y-Axis         | Z-Axis   |
| Number             | Value  | (Rad/Time) | (Cycles/Time) |                              |                |          |
| <b>1</b>           | 156.25 | 12.5       | <b>1.9894</b> | 7.28E-32                     | 1.29E-06       | 4.83E-30 |
| <b>2</b>           | 263.83 | 16.243     | <b>2.5851</b> | 3.25E-31                     | <b>1623.33</b> | 8.46E-33 |
| <b>3</b>           | 1322.9 | 36.371     | <b>5.7887</b> | 2.80E-30                     | <b>1554.2</b>  | 1.30E-30 |
| <b>4</b>           | 1357   | 36.838     | <b>5.8629</b> | 7.77E-31                     | <b>377.657</b> | 1.29E-31 |
| 5                  | 3270.3 | 57.187     | 9.1015        | 2.93E-30                     | 1.99E-07       | 1.14E-28 |
| 6                  | 4397.7 | 66.315     | 10.554        | 4.77E-31                     | 0.05959        | 2.93E-29 |
| 7                  | 5631   | 75.04      | 11.943        | 1.66E-30                     | 4.10E-07       | 9.46E-29 |
| 8                  | 7848.7 | 88.593     | 14.1          | 1.08E-28                     | 4.81E-09       | 1.02E-33 |
| <b>9</b>           | 11892  | 109.05     | <b>17.356</b> | 4.44E-28                     | <b>117.041</b> | 9.09E-28 |
| 10                 | 23410  | 153        | 24.351        | 4.22E-30                     | 13.2134        | 1.05E-28 |
| 11                 | 24754  | 157.33     | 25.041        | 1.15E-28                     | 43.6661        | 6.34E-28 |
| 12                 | 33380  | 182.7      | 29.078        | 2.48E-28                     | 2.27E-07       | 4.62E-27 |
| <b>13</b>          | 42378  | 205.86     | <b>32.764</b> | 4.91E-27                     | <b>351.593</b> | 3.44E-27 |
| 14                 | 55747  | 236.11     | 37.578        | 1.34E-25                     | 2.05E-07       | 1.05E-24 |
| 15                 | 71139  | 266.72     | 42.45         | 6.55E-21                     | 5.11E-07       | 4.55E-22 |
| <b>16</b>          | 95222  | 308.58     | <b>49.112</b> | 7.25E-19                     | <b>108.981</b> | 4.37E-19 |
| 17                 | 106000 | 326.05     | 51.892        | 1.17E-17                     | 23.5505        | 1.35E-17 |
| <b>18</b>          | 111000 | 333.47     | <b>53.074</b> | 1.40E-17                     | <b>265.408</b> | 1.50E-17 |
| 19                 | 126000 | 355.47     | 56.574        | 2.71E-17                     | 8.00E-11       | 8.70E-19 |
| 20                 | 143000 | 377.59     | 60.096        | 2.32E-17                     | 4.18081        | 1.31E-17 |
| <b>Total</b>       |        |            |               | 7.67E-17                     | <b>4482.88</b> | 4.30E-17 |

**Table F. Computer simulation of the first twenty natural frequencies and modal effective mass in Y-axis for the models A, B, ..., and I.**

| Modes | A        |           | B        |           | C        |           | D        |           | E        |           | F        |           | G        |           | H        |           | I        |           |
|-------|----------|-----------|----------|-----------|----------|-----------|----------|-----------|----------|-----------|----------|-----------|----------|-----------|----------|-----------|----------|-----------|
|       | <i>F</i> | <i>EM</i> | <i>F</i> | <i>EM</i> | <i>F</i> | <i>EM</i> | <i>F</i> | <i>EM</i> | <i>F</i> | <i>EM</i> | <i>F</i> | <i>EM</i> | <i>F</i> | <i>EM</i> | <i>F</i> | <i>EM</i> | <i>F</i> | <i>EM</i> |
| 1     | 3.15     | 0.00      | 2.57     | 0.00      | 2.22     | 0.00      | 1.99     | 0.00      | 1.82     | 0.00      | 1.68     | 0.00      | 1.57     | 0.00      | 1.48     | 0.00      | 1.41     | 0.00      |
| 2     | 4.09     | 649.38    | 3.34     | 974.03    | 2.89     | 1298.68   | 2.59     | 1623.33   | 2.36     | 1947.99   | 2.18     | 2272.64   | 2.04     | 2597.29   | 1.93     | 2921.94   | 1.83     | 3246.59   |
| 3     | 9.15     | 621.27    | 7.47     | 932.24    | 6.47     | 1243.22   | 5.79     | 1554.20   | 5.28     | 1865.18   | 4.89     | 2176.16   | 4.58     | 2487.14   | 4.31     | 2798.12   | 4.09     | 3109.10   |
| 4     | 9.27     | 151.47    | 7.57     | 226.87    | 6.56     | 302.26    | 5.86     | 377.66    | 5.35     | 453.05    | 4.96     | 528.45    | 4.63     | 603.84    | 4.37     | 679.24    | 4.15     | 754.63    |
| 5     | 14.39    | 0.00      | 11.75    | 0.00      | 10.18    | 0.00      | 9.10     | 0.00      | 8.31     | 0.00      | 7.69     | 0.00      | 7.20     | 0.00      | 6.78     | 0.00      | 6.44     | 0.00      |
| 6     | 16.69    | 0.02      | 13.63    | 0.04      | 11.80    | 0.05      | 10.55    | 0.06      | 9.63     | 0.07      | 8.92     | 0.08      | 8.34     | 0.10      | 7.87     | 0.11      | 7.46     | 0.12      |
| 7     | 18.88    | 0.00      | 15.42    | 0.00      | 13.35    | 0.00      | 11.94    | 0.00      | 10.90    | 0.00      | 10.09    | 0.00      | 9.44     | 0.00      | 8.90     | 0.00      | 8.45     | 0.00      |
| 8     | 22.29    | 0.00      | 18.20    | 0.00      | 15.76    | 0.00      | 14.10    | 0.00      | 12.87    | 0.00      | 11.92    | 0.00      | 11.15    | 0.00      | 10.51    | 0.00      | 9.97     | 0.00      |
| 9     | 27.44    | 46.84     | 22.41    | 70.24     | 19.40    | 93.64     | 17.36    | 117.04    | 15.84    | 140.44    | 14.67    | 163.84    | 13.72    | 187.25    | 12.94    | 210.65    | 12.27    | 234.05    |
| 10    | 38.50    | 5.28      | 31.44    | 7.92      | 27.23    | 10.57     | 24.35    | 13.21     | 22.23    | 15.86     | 20.58    | 18.50     | 19.25    | 21.15     | 18.15    | 23.80     | 17.22    | 26.44     |
| 11    | 39.60    | 17.46     | 32.33    | 26.20     | 28.00    | 34.93     | 25.04    | 43.67     | 22.86    | 52.40     | 21.16    | 61.14     | 19.80    | 69.87     | 18.66    | 78.60     | 17.71    | 87.34     |
| 12    | 45.97    | 0.00      | 37.54    | 0.00      | 32.51    | 0.00      | 29.08    | 0.00      | 26.55    | 0.00      | 24.58    | 0.00      | 22.99    | 0.00      | 21.67    | 0.00      | 20.56    | 0.00      |
| 13    | 51.80    | 140.64    | 42.30    | 210.96    | 36.63    | 281.28    | 32.76    | 351.59    | 29.91    | 421.91    | 27.69    | 492.23    | 25.90    | 562.55    | 24.42    | 632.86    | 23.17    | 703.18    |
| 14    | 59.42    | 0.00      | 48.52    | 0.00      | 42.01    | 0.00      | 37.58    | 0.00      | 34.30    | 0.00      | 31.76    | 0.00      | 29.71    | 0.00      | 28.01    | 0.00      | 26.57    | 0.00      |
| 15    | 67.12    | 0.00      | 54.80    | 0.00      | 47.46    | 0.00      | 42.45    | 0.00      | 38.75    | 0.00      | 35.88    | 0.00      | 33.56    | 0.00      | 31.64    | 0.00      | 30.02    | 0.00      |
| 16    | 77.65    | 43.64     | 63.40    | 65.42     | 54.91    | 87.20     | 49.11    | 108.98    | 44.83    | 130.76    | 41.51    | 152.54    | 38.83    | 174.32    | 36.61    | 196.10    | 34.73    | 217.88    |
| 17    | 82.06    | 9.30      | 67.00    | 14.05     | 58.02    | 18.80     | 51.89    | 23.55     | 47.37    | 28.30     | 43.86    | 33.05     | 41.02    | 37.80     | 38.68    | 42.55     | 36.69    | 47.29     |
| 18    | 83.92    | 106.23    | 68.52    | 159.29    | 59.34    | 212.35    | 53.07    | 265.41    | 48.45    | 318.47    | 44.86    | 371.53    | 41.96    | 424.59    | 39.56    | 477.64    | 37.53    | 530.70    |
| 19    | 89.45    | 0.00      | 73.04    | 0.00      | 63.25    | 0.00      | 56.57    | 0.00      | 51.65    | 0.00      | 47.81    | 0.00      | 44.73    | 0.00      | 42.17    | 0.00      | 40.00    | 0.00      |
| 20    | 95.02    | 1.67      | 77.58    | 2.51      | 67.19    | 3.34      | 60.10    | 4.18      | 54.86    | 5.02      | 50.79    | 5.86      | 47.51    | 6.69      | 44.79    | 7.53      | 42.49    | 8.37      |

Models A, B, C, ..., I    Modes 1, 2, 3, ..., 20    *f*=Frequency in Hertz    EM=Effective Mass (Y-Axis) in Grams
